# Supplementary material
Source: PubMed Central journal article supplement (PMC3904603)
Supplement: JCI68101sd.pdf [file JCI68101sd.pdf]

## **Supplemental Data**

### **NF- $\kappa$ B/TNF- $\alpha$ positive feedback loop supports myeloid leukemia initiating cell capacity**

Yuki Kagoya, Akihide Yoshimi, Keisuke Kataoka, Masahiro Nakagawa, Keiki Kumano, Shunya Arai,

Hiroshi Kobayashi, Taku Saito, Yoichiro Iwakura, Mineo Kurokawa

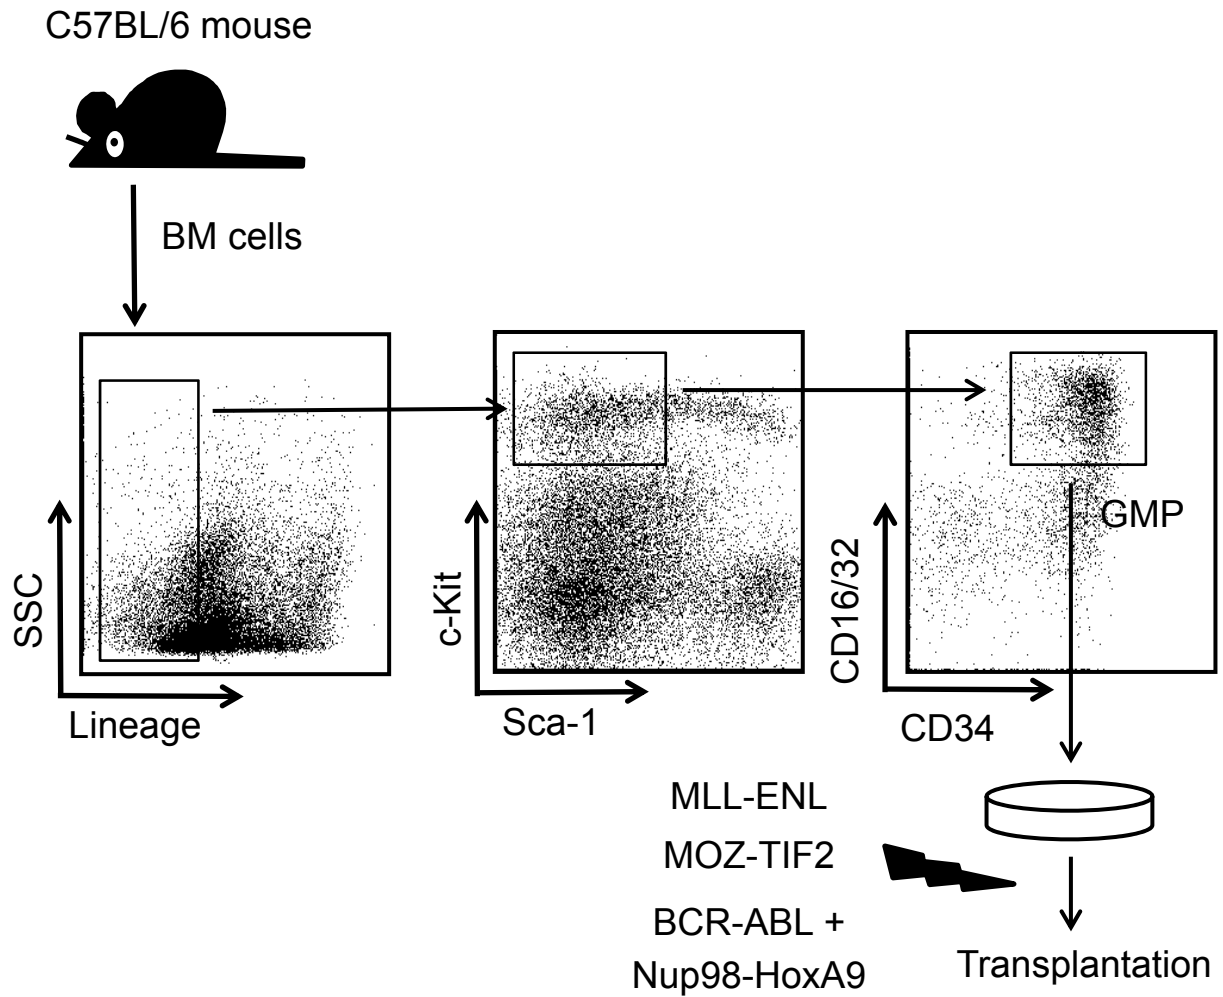

**Supplemental Figure 1.** Generation of three myeloid leukemia mouse models. Bone marrow granulocyte-monocyte progenitors (GMP) isolated from C57BL/6 mice were transduced with MLL-ENL, MOZ-TIF2, or BCR-ABL + Nup98-HoxA9 and transplanted into irradiated recipient mice.

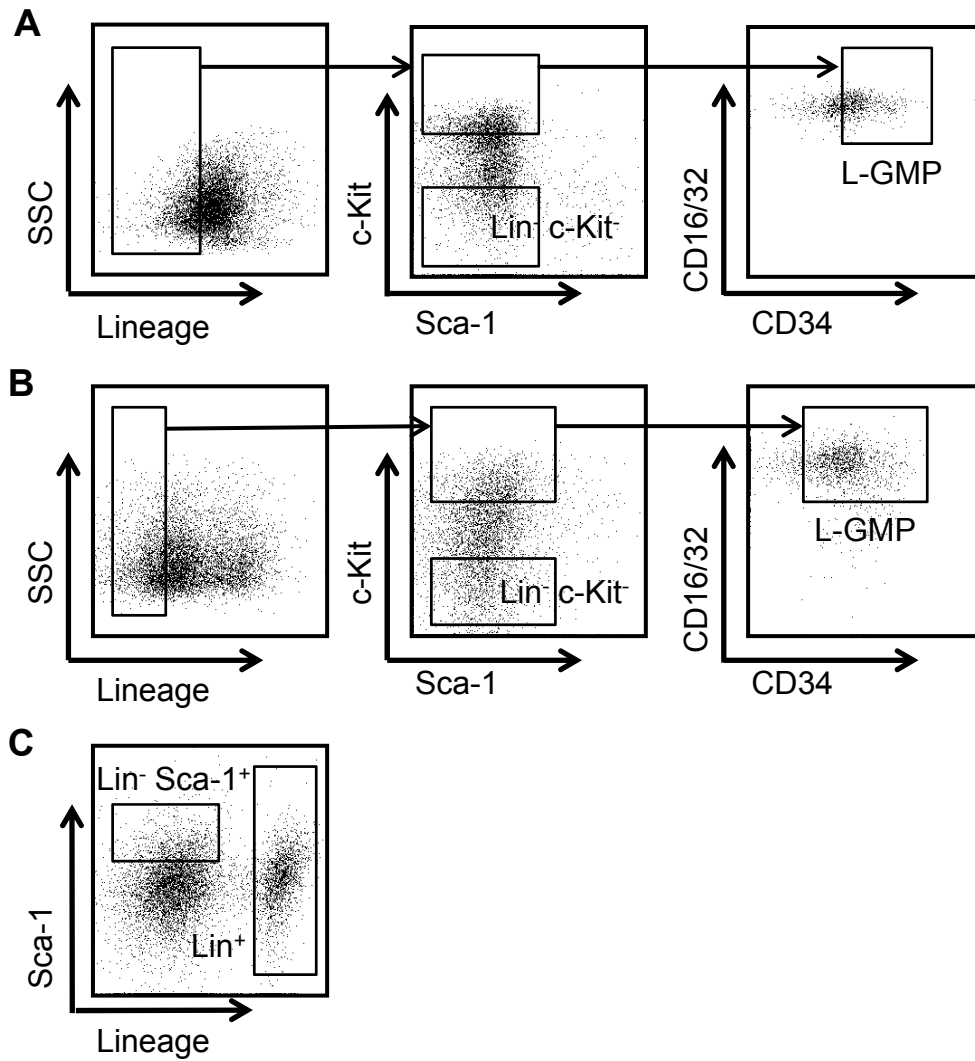

**Supplemental Figure 2.** Isolation of LIC and non-LIC from each leukemia model. (A, B) L-GMP and Lin<sup>-</sup> c-Kit<sup>-</sup> fractions were isolated from MLL-ENL (A) and MOZ-TIF2-induced leukemia mice (B). (C) Lin<sup>-</sup> Sca-1<sup>+</sup> and Lin<sup>+</sup> fractions were isolated from BCR-ABL/Nup98-HoxA9-induced leukemia mice.

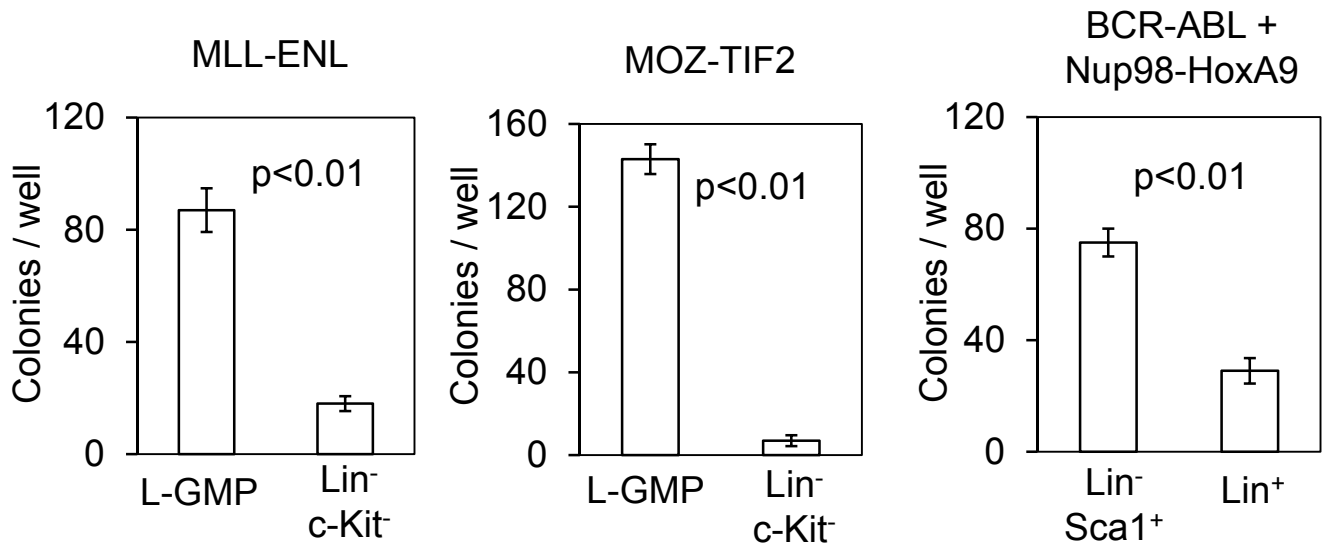

**Supplemental Figure 3.** Colony-forming cell assay in the two fractions from each leukemia model (n=3 each). Cells were seeded at 200 cells per well in MLL-ENL or MOZ-TIF2-induced leukemia cells, and at 1000 cells per well in BCR-ABL/Nup98-HoxA9-induced leukemia mice. Error bars indicate SD.

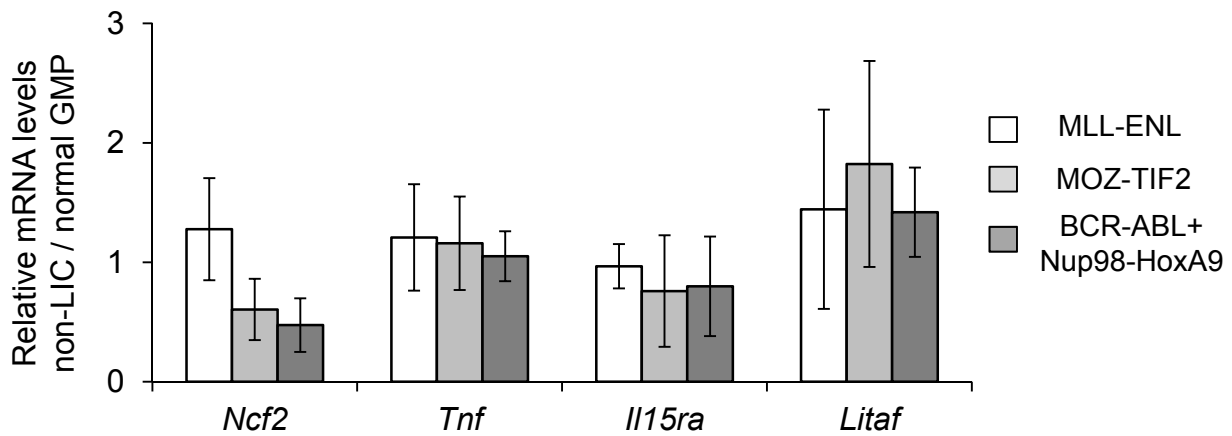

**Supplemental Figure 4.** Quantitative real-time PCR analysis of a subset of NF- $\kappa$ B target genes in non-LIC of MLL-ENL, MOZ-TIF2, and BCR-ABL/Nup98-HoxA9-induced leukemia models relative to normal GMP (n=4 each). Error bars indicate SD.

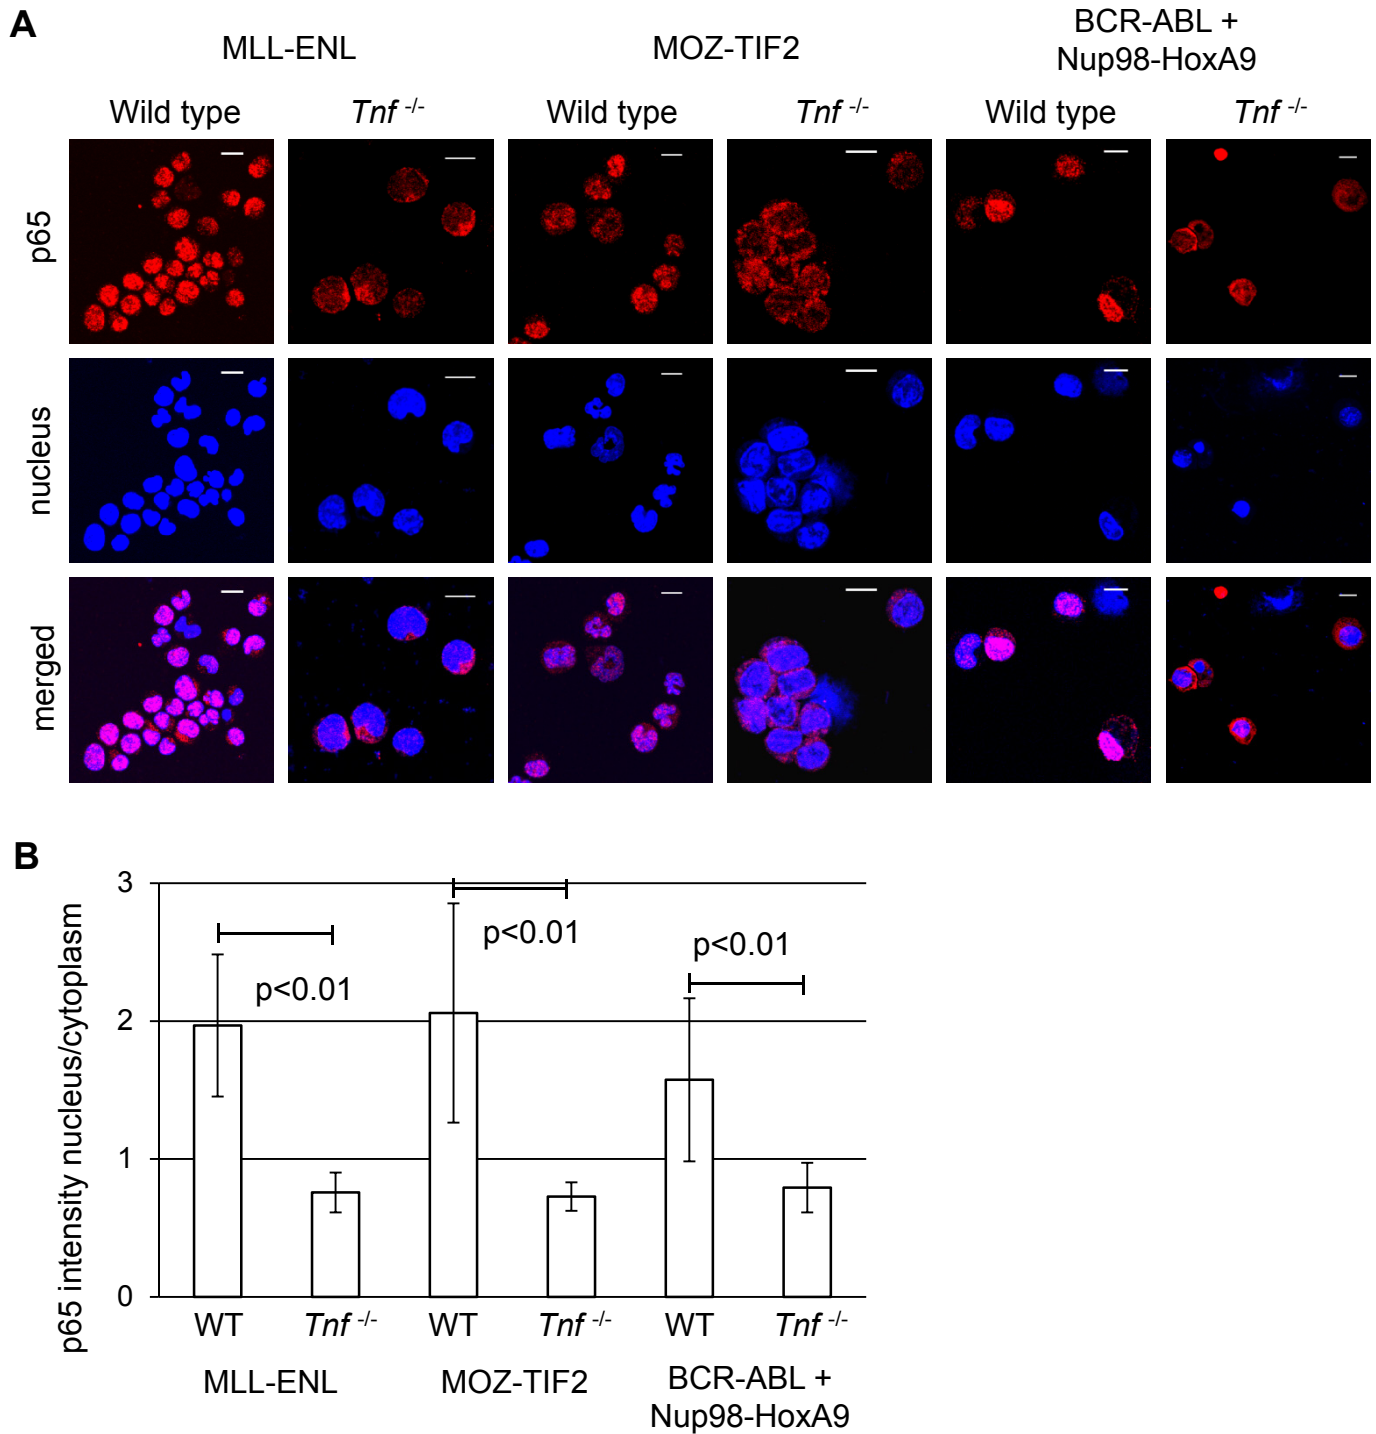

**Supplemental Figure 5.** NF- $\kappa$ B pathway activity is attenuated in *Tnf*-deficient LIC. (A) Immunofluorescence assessment for p65 nuclear translocation in LIC of three leukemia models established from wild-type or *Tnf*<sup>-/-</sup> mice. Scale bar, 10  $\mu$ m. (B) Quantification of p65 nuclear translocation assessed by the mean intensity ratio between nucleus and cytoplasm. More than 50 cells were scored in each specimen and the average intensity ratio with SD is shown.

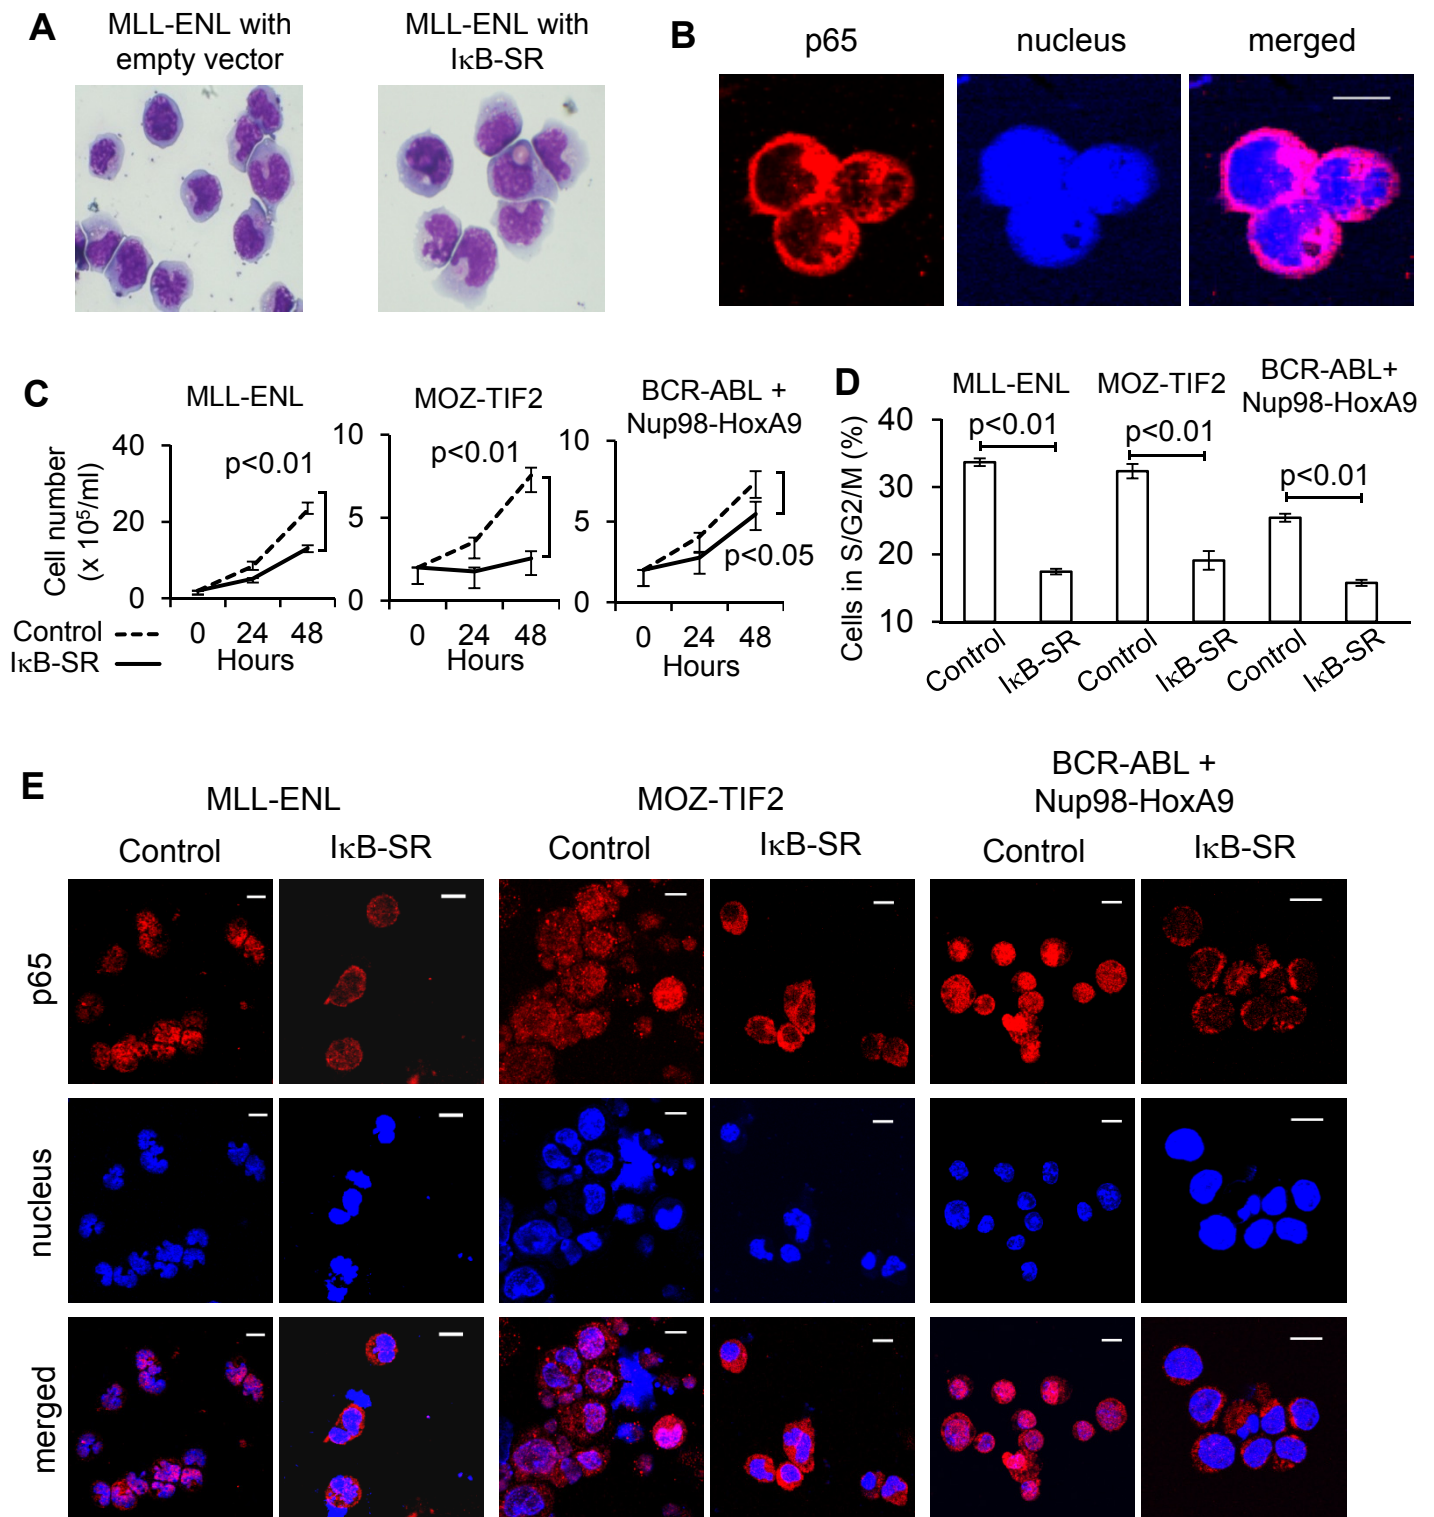

**Supplemental Figure 6.** Influence of NF- $\kappa\text{B}$  inhibition on leukemia cells. (A) Leukemic bone marrow mononuclear cells of MLL-ENL leukemia with  $\text{I}\kappa\text{B-SR}$  stained with Wright-Giemsa. (B) Immunofluorescence staining of p65 in MLL-ENL L-GMP with  $\text{I}\kappa\text{B-SR}$ . Scale bar, 10  $\mu\text{m}$ . (C, D) Cell cycle analysis (C) and proliferation status (D) of leukemia cells with or without  $\text{I}\kappa\text{B-SR}$  ( $n=3$  in each experiment). (E) Immunofluorescence staining of p65 in LIC with or without  $\text{I}\kappa\text{B-SR}$  recovered from secondary recipient mice. Scale bar, 10  $\mu\text{m}$ .

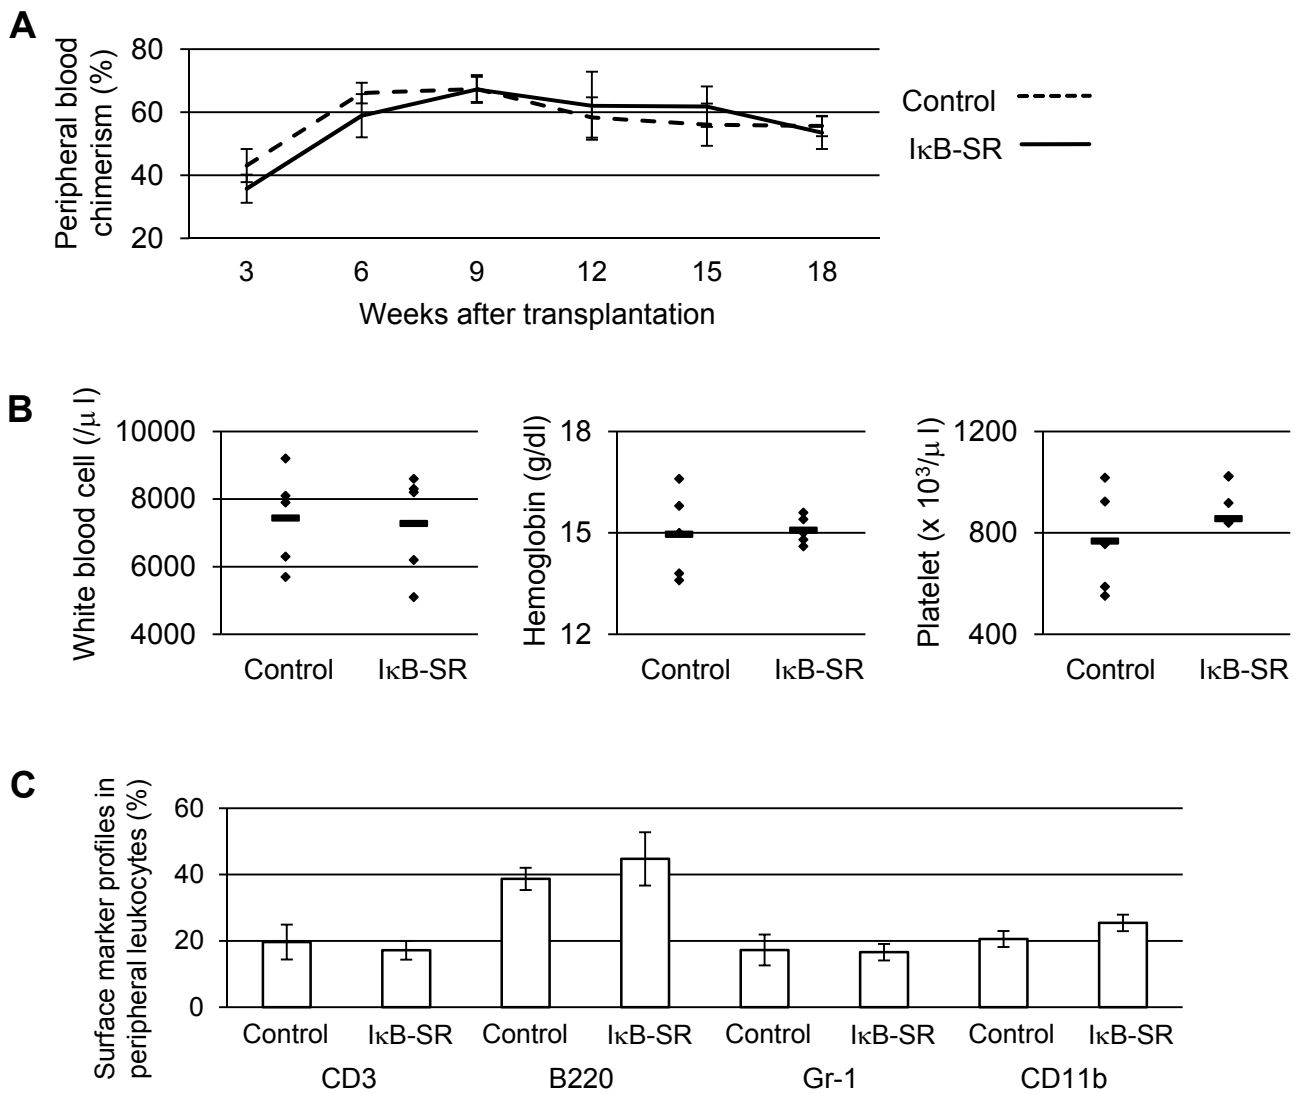

**Supplemental Figure 7.** Influence of NF- $\kappa$ B inhibition on normal hematopoietic cells. (A-C) Normal c-Kit<sup>+</sup> bone marrow cells were transduced with I $\kappa$ B-SR-IRES-Kusabira Orange or empty vector and transplanted into lethally irradiated mice. Peripheral blood Kusabira Orange positivity was monitored after transplantation (A). Complete blood cell counts (B) and surface marker profiles in peripheral leukocytes (C) were examined in individual mice 18 weeks after transplantation.



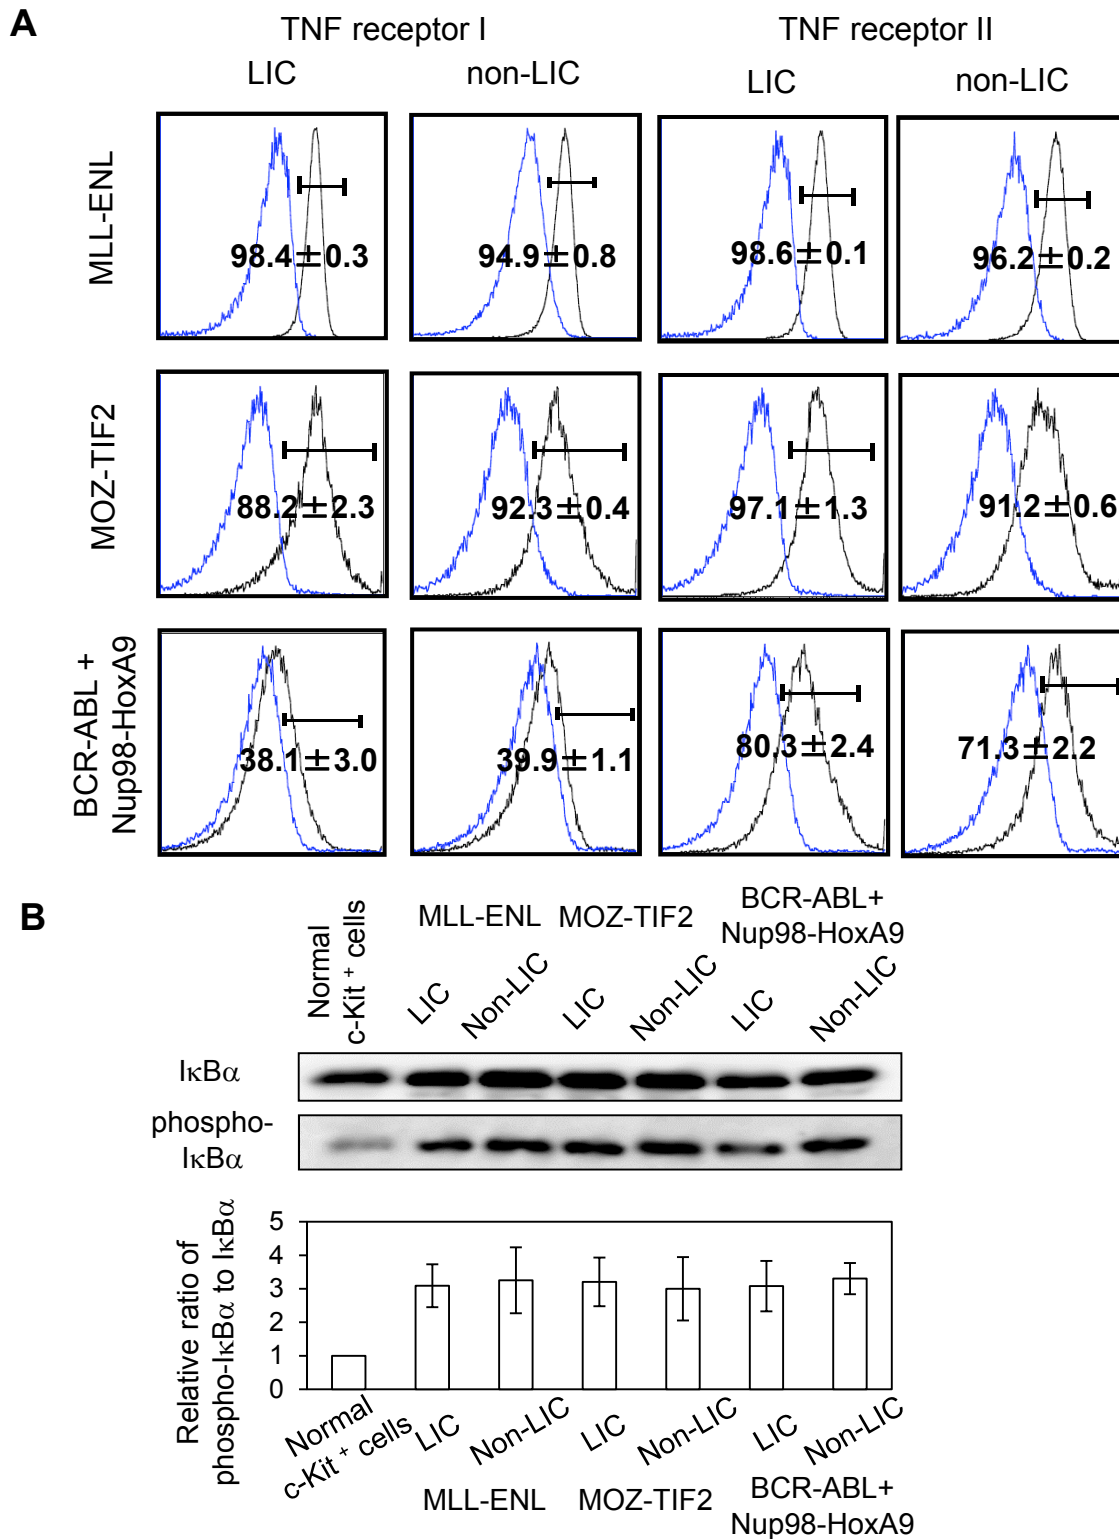

**Supplemental Figure 8.** Comparison of TNF receptors expression and IKK activity between LIC and non-LIC. (A) Expression of TNF receptors in LIC and non-LIC of each leukemia model. Representative FACS plots and average percent positive  $\pm$  SD are shown (n=3 each). Blue lines represent the isotype control. (B) Immunoblotting of IκBα and phosphorylated form of IκBα in normal c-Kit<sup>+</sup> cells, LIC and non-LIC in different types of leukemia cells two hours after treatment with 20 μM MG132. Protein levels were quantified with ImageJ software and the relative ratio of phosphorylated IκBα to total IκBα compared with those of normal cells were calculated (n=3 each). Error bars indicate SD.

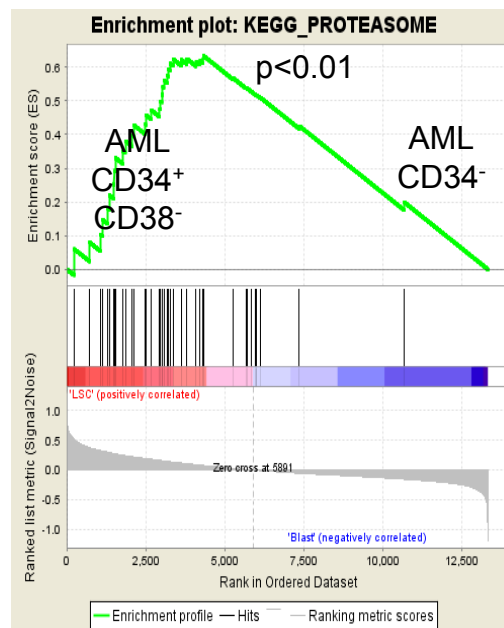

**Supplemental Figure 9.** Gene set enrichment analysis for expression profiles of proteasome subunits: comparison of CD34<sup>+</sup> CD38<sup>-</sup> cells with CD34<sup>-</sup> leukemia cells in human AML samples.

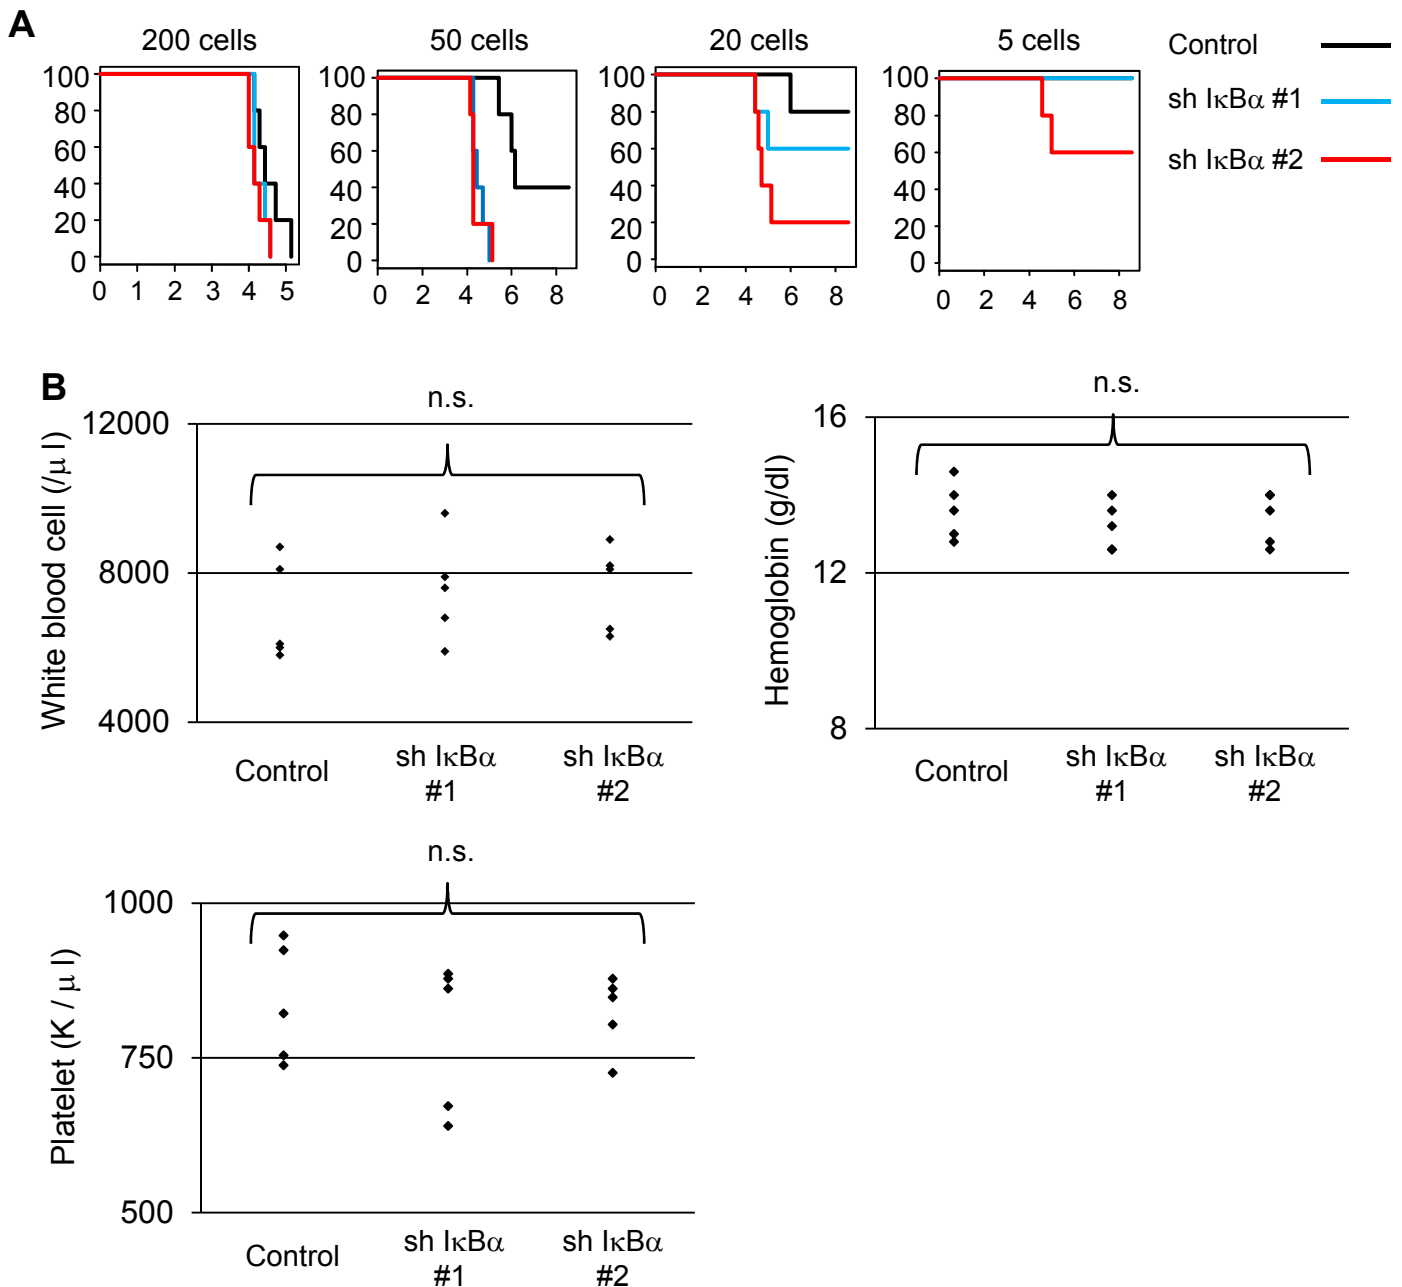

**Supplemental Figure 10.** Influence of IκBα knockdown on leukemia progression and normal hematopoiesis. (A) Limiting dilution transplant assay of bone marrow mononuclear cells derived from MLL-ENL-IκBα<sup>KD</sup> leukemia mice compared with control mice. (B) Peripheral blood cell counts in mice transplanted with normal c-Kit<sup>+</sup> cells with shRNA against IκBα or control shRNA. Data at 18 weeks after transplantation are shown (n=5 each).

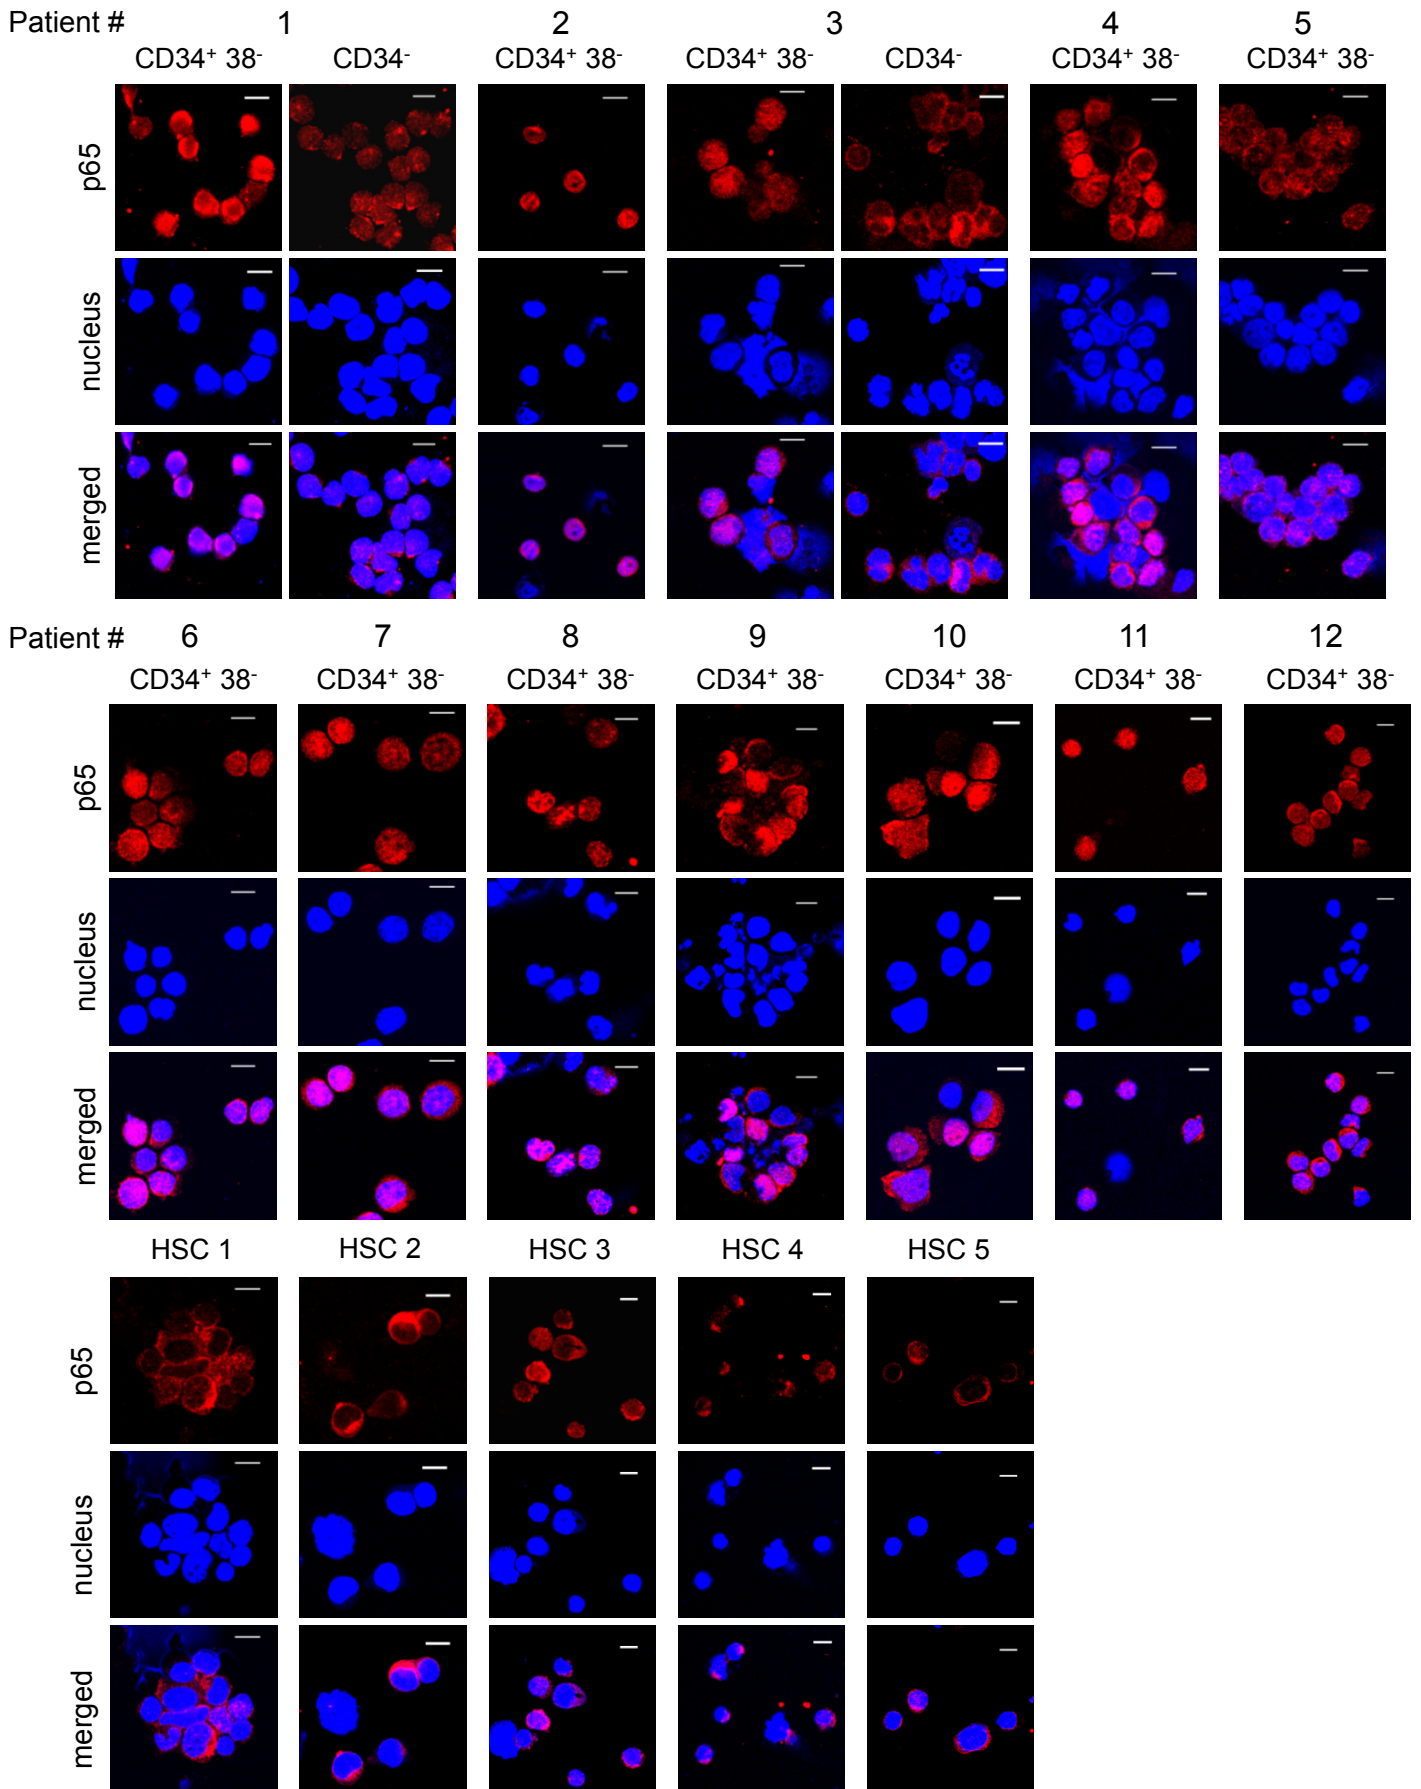

**Supplemental Figure 11.** Immunofluorescence assessment for p65 nuclear translocation of CD34<sup>+</sup> CD38<sup>-</sup> cells or CD34<sup>-</sup> cells isolated from 12 patients with AML and 5 normal controls. Scale bar, 10  $\mu$ m.

## Supplemental Table 1

Limiting dilution transplantation assay data.

| Leukemia model           | Cell population                     | Transplanted cells | Incidence of leukemia (%) |
|--------------------------|-------------------------------------|--------------------|---------------------------|
| MLL-ENL                  | L-GMP                               | 1000               | 4/4 (100)                 |
|                          |                                     | 100                | 4/4 (100)                 |
|                          |                                     | 20                 | 4/4 (100)                 |
|                          |                                     | 5                  | 2/5 (40)                  |
|                          | Lin <sup>-</sup> c-Kit <sup>-</sup> | 10000              | 4/4 (100)                 |
|                          |                                     | 1000               | 3/4 (75)                  |
|                          |                                     | 200                | 2/4 (50)                  |
|                          |                                     | 20                 | 0/4 (0)                   |
| MOZ-TIF2                 | L-GMP                               | 10000              | 4/4 (100)                 |
|                          |                                     | 1000               | 4/4 (100)                 |
|                          |                                     | 100                | 2/6 (33)                  |
|                          |                                     | 20                 | 0/4 (0)                   |
|                          | Lin <sup>-</sup> c-Kit <sup>-</sup> | 500000             | 4/4 (100)                 |
|                          |                                     | 100000             | 2/6 (33)                  |
|                          |                                     | 10000              | 0/4 (0)                   |
| BCR-ABL +<br>Nup98-HoxA9 | Lin <sup>-</sup> Sca1 <sup>+</sup>  | 10000              | 4/4 (100)                 |
|                          |                                     | 1000               | 4/4 (100)                 |
|                          |                                     | 200                | 4/4 (100)                 |
|                          |                                     | 20                 | 3/4 (75)                  |
|                          | Lin <sup>+</sup>                    | 10000              | 4/4 (100)                 |
|                          |                                     | 1000               | 1/4 (25)                  |
|                          |                                     | 200                | 0/4 (0)                   |
|                          |                                     | 20                 | 0/4 (0)                   |

**Supplemental Table 2**Previously investigated NF- $\kappa$ B-regulated genes.

| Gene symbol   | Gene full name                                                                    |
|---------------|-----------------------------------------------------------------------------------|
| <i>EMR1</i>   | egf-like module containing, mucin-like, hormone receptor-like 1                   |
| <i>CD86</i>   | CD86 molecule                                                                     |
| <i>CD44</i>   | CD44 molecule (Indian blood group)                                                |
| <i>IL15RA</i> | interleukin 15 receptor, alpha                                                    |
| <i>CD40</i>   | CD40 molecule, TNF receptor superfamily member 5                                  |
| <i>CCR7</i>   | chemokine (C-C motif) receptor 7                                                  |
| <i>ICAM1</i>  | intercellular adhesion molecule 1 (CD54), human rhinovirus receptor               |
| <i>CD83</i>   | CD83 molecule                                                                     |
| <i>IER3</i>   | immediate early response 3                                                        |
| <i>BCL2L1</i> | BCL2-like 1                                                                       |
| <i>BCL2A1</i> | BCL2-related protein A1                                                           |
| <i>FAS</i>    | Fas (TNF receptor superfamily, member 6)                                          |
| <i>BIRC3</i>  | baculoviral IAP repeat-containing 3                                               |
| <i>TRAF1</i>  | TNF receptor-associated factor 1                                                  |
| <i>RRAS2</i>  | related RAS viral (r-ras) oncogene homolog 2                                      |
| <i>TNIP1</i>  | TNFAIP3 interacting protein 1                                                     |
| <i>PRKCD</i>  | protein kinase C, delta                                                           |
| <i>SMAD7</i>  | SMAD, mothers against DPP homolog 7 (Drosophila)                                  |
| <i>LSP1</i>   | lymphocyte-specific protein 1                                                     |
| <i>IRF1</i>   | interferon regulatory factor 1                                                    |
| <i>SPIB</i>   | Spi-B transcription factor (Spi-1/PU.1 related)                                   |
| <i>STAT5A</i> | signal transducer and activator of transcription 5A                               |
| <i>NFKB2</i>  | nuclear factor of kappa light polypeptide gene enhancer in B-cells 2 (p49/p100)   |
| <i>NCF2</i>   | neutrophil cytosolic factor 2 (65kDa, chronic granulomatous disease, autosomal 2) |
| <i>RFTN1</i>  | raftlin lipid raft linker 1                                                       |
| <i>SLC2A5</i> | solute carrier family 2 (facilitated glucose/fructose transporter), member 5      |
| <i>TFPI2</i>  | tissue factor pathway inhibitor 2                                                 |
| <i>AMPH</i>   | amphiphysin (Stiff-Man syndrome with breast cancer 128kDa autoantigen)            |
| <i>NOPI4</i>  | nucleolar protein homolog (yeast)                                                 |
| <i>WTAP</i>   | Wilms tumor 1 associated protein                                                  |
| <i>PASK</i>   | PAS domain containing serine/threonine kinase                                     |
| <i>TPMT</i>   | thiopurine S-methyltransferase                                                    |
| <i>STX4</i>   | syntaxin 4                                                                        |
| <i>HLA-F</i>  | major histocompatibility complex, class I, F                                      |
| <i>LITAF</i>  | lipopolysaccharide-induced TNF factor                                             |
| <i>LTA</i>    | lymphotoxin alpha (TNF superfamily, member 1)                                     |

|               |                                                      |
|---------------|------------------------------------------------------|
| <i>CX3CL1</i> | chemokine (C-X3-C motif) ligand 1                    |
| <i>IL13</i>   | interleukin 13                                       |
| <i>CCL3</i>   | chemokine (C-C motif) ligand 3                       |
| <i>CSF2</i>   | colony stimulating factor 2 (granulocyte-macrophage) |
| <i>CCL22</i>  | chemokine (C-C motif) ligand 22                      |
| <i>IL6</i>    | interleukin 6 (interferon, beta 2)                   |
| <i>TNF</i>    | tumor necrosis factor (TNF superfamily, member 2)    |
| <i>CCL1</i>   | chemokine (C-C motif) ligand 1                       |
